# Supplementary material
Source: PubMed Central journal article supplement (PMC4430392)
Supplement: NIHMS682212-supplement.pdf [file NIHMS682212-supplement.pdf]

## Supplementary Tables

|               | A431 chloride salt | A431 DTT/f      | CHO DTT/f       | T test A431 DTT/f & chloride salt | T test A431 DTT/f & CHO DTT/f |
|---------------|--------------------|-----------------|-----------------|-----------------------------------|-------------------------------|
| <b>FC</b>     | 33.5±0.1           | 30.4±1.4        | 22.5±1.7        | 0.09                              | 0.02                          |
| <b>CE</b>     | 0.6±0.1            | 0.6±0.04        | 7.5±0.4         | 0.7                               | 7.1E-05                       |
| <b>MG</b>     | 0.2±0.05           | 0.4±0.01        | 0.2±0.04        | 0.04                              | 0.03                          |
| <b>DG</b>     | 0.6±0.2            | 0.7±0.06        | 1.3±0.1         | 0.5                               | 0.03                          |
| <b>TG</b>     | 0.2±0.05           | 0.06±0.01       | 0.020±0.002     | 0.05                              | 0.06                          |
| <b>Cer</b>    | 1.4±0.5            | 0.3±0.01        | 0.4±0.02        | 0.09                              | 0.008                         |
| <b>SM</b>     | 4.7±0.4            | 5.3±0.4         | 6.7±0.5         | 0.4                               | 0.1                           |
| <b>dhSM</b>   | 1.2±0.04           | 1.2±0.03        | 0.2±0.03        | 0.3                               | 2.5E-05                       |
| <b>GalCer</b> | 0.0003±0.00002     | 0.0004±1.6E-05  | 0.0002±1.3E-05  | 0.03                              | 0.001                         |
| <b>Sulf</b>   | 0.003±0.0007       | 0.003±0.0001    | 0.002±7.8E-05   | 0.2                               | 0.006                         |
| <b>GlcCer</b> | 0.2±0.05           | 0.09±0.009      | 0.2±0.02        | 0.3                               | 0.01                          |
| <b>LacCer</b> | 0.05±0.02          | 0.05±0.01       | 0.3±0.08        | 0.9                               | 0.03                          |
| <b>GM3</b>    | 0.2±0.04           | 0.2±0.05        | 1.4±0.1         | 0.6                               | 0.0009                        |
| <b>PA</b>     | 0.1±0.01           | 0.2±0.02        | 0.06±0.02       | 0.01                              | 0.02                          |
| <b>PC</b>     | 28.9±0.5           | 35.2±1.4        | 38.9±3.2        | 0.01                              | 0.3                           |
| <b>PCe</b>    | 7.4±2.2            | 4.2±0.5         | 8.9±1.8         | 0.2                               | 0.07                          |
| <b>PE</b>     | 2.7±0.6            | 4.1±0.2         | 2.6±0.2         | 0.09                              | 0.005                         |
| <b>PEp</b>    | 9.1±0.7            | 6.9±0.2         | 2.1±0.09        | 0.04                              | 2.7E-05                       |
| <b>PG</b>     | 0.2±0.1            | 0.1±0.002       | 0.1±0.006       | 0.4                               | 0.008                         |
| <b>PI</b>     | 4.0±0.9            | 4.2±0.6         | 2.9±0.3         | 0.9                               | 0.1                           |
| <b>PS</b>     | 3.9±0.4            | 4.5±0.2         | 2.4±0.1         | 0.3                               | 0.002                         |
| <b>LPC</b>    | 0.5±0.2            | 0.9±0.6         | 0.7±0.4         | 0.5                               | 0.7                           |
| <b>LPCe</b>   | 0.03±0.02          | 0.04±0.02       | 0.06±0.05       | 0.8                               | 0.7                           |
| <b>LPE</b>    | 0.09±0.02          | 0.2±0.01        | 0.2±0.03        | 0.004                             | 0.3                           |
| <b>LPEp</b>   | 0.1±0.1            | 0.02±0.003      | 0.01±0.003      | 0.3                               | 0.2                           |
| <b>LPI</b>    | 0.02±0.01          | 0.02±0.003      | 0.07±0.02       | 0.8                               | 0.08                          |
| <b>BMP</b>    | 0.2±0.06           | 0.1±0.006       | 0.02±0.002      | 0.4                               | 0.0001                        |
| <b>APG</b>    | 0.004±0.0006       | 0.004±3.2E-05   | 0.002±0.0003    | 0.5                               | 0.01                          |
| <b>NAPE</b>   | 4.4E-05±1.5E-05    | 4.7E-05±3.4E-06 | 4.1E-05±6.6E-06 | 0.8                               | 0.5                           |
| <b>NAPEp</b>  | 0.0006±0.0002      | 0.0006±6.3E-05  | 0.0002±2.1E-05  | 0.9                               | 0.004                         |
| <b>NAPS</b>   | 0.008±0.003        | 0.002±0.0003    | 0.001±0.0001    | 0.1                               | 0.02                          |

Table S1. Lipid and cholesterol composition of A431 chloride salt vesicles, A431 DTT/formaldehyde vesicles, and CHO DTT/formaldehyde vesicles (see also Figure 1).

|               | A431 chloride salt | A431 DTT/f      | CHO DTT/f        | T test A431 DTT/f & chloride salt | T test A431 DTT/f & CHO DTT/f |
|---------------|--------------------|-----------------|------------------|-----------------------------------|-------------------------------|
| <b>MG</b>     | 0.3±0.08           | 0.5±0.01        | 0.3±0.06         | 0.05                              | 0.02                          |
| <b>DG</b>     | 0.9±0.3            | 1.0±0.09        | 1.8±0.2          | 0.6                               | 0.02                          |
| <b>TG</b>     | 0.3±0.08           | 0.08±0.02       | 0.03±0.004       | 0.05                              | 0.07                          |
| <b>Cer</b>    | 2.0±0.7            | 0.5±0.02        | 0.6±0.02         | 0.09                              | 0.01                          |
| <b>SM</b>     | 7.2±0.6            | 7.7±0.6         | 9.6±0.5          | 0.6                               | 0.07                          |
| <b>dhSM</b>   | 1.8±0.05           | 1.7±0.7         | 0.3±0.05         | 0.1                               | 0.0001                        |
| <b>GalCer</b> | 0.0004±0.00003     | 0.0005±0.00002  | 0.0003±0.00002   | 0.04                              | 0.0005                        |
| <b>Sulf</b>   | 0.004±0.0001       | 0.004±0.0001    | 0.003±0.0002     | 0.5                               | 0.006                         |
| <b>GlcCer</b> | 4±0.07             | 0.1±0.01        | 0.3±0.02         | 0.2                               | 0.007                         |
| <b>LacCer</b> | 0.08±0.02          | 0.08±0.02       | 0.4±0.1          | 0.9                               | 0.03                          |
| <b>GM3</b>    | 0.3±0.06           | 0.3±0.08        | 1.9±0.1          | 0.7                               | 0.0003                        |
| <b>PA</b>     | 0.1±0.01           | 0.3±0.02        | 0.09±0.04        | 0.02                              | 0.02                          |
| <b>PC</b>     | 43.8±0.8           | 51.0±1.4        | 55.5±3.1         | 0.01                              | 0.2                           |
| <b>PCe</b>    | 11.3±3.3           | 6.0±0.7         | 12.9±3.1         | 0.2                               | 0.09                          |
| <b>PE</b>     | 4.0±0.9            | 6.0±0.4         | 3.8±0.4          | 0.1                               | 0.01                          |
| <b>PEp</b>    | 13.9±1.1           | 10.0±0.4        | 3.0±0.2          | 0.03                              | 0.00008                       |
| <b>PG</b>     | 0.3±0.1            | 0.1±0.005       | 0.20±0.004       | 0.4                               | 0.002                         |
| <b>PI</b>     | 6.1±1.4            | 6.1±0.9         | 4.2±0.3          | 1.0                               | 0.1                           |
| <b>PS</b>     | 5.9±0.6            | 6.5±0.4         | 3.5±0.1          | 0.4                               | 0.001                         |
| <b>LPC</b>    | 0.7±0.3            | 1.3±0.9         | 1.0±0.6          | 0.5                               | 0.8                           |
| <b>LPCe</b>   | 0.04±0.02          | 0.05±0.03       | 0.09±0.07        | 0.8                               | 0.6                           |
| <b>LPE</b>    | 0.1±0.03           | 0.3±0.02        | 0.3±0.04         | 0.006                             | 0.2                           |
| <b>LPEp</b>   | 0.2±0.2            | 0.02±0.005      | 0.01±0.005       | 0.3                               | 0.2                           |
| <b>LPI</b>    | 0.03±0.02          | 0.03±0.004      | 0.1±0.03         | 0.9                               | 0.08                          |
| <b>BMP</b>    | 0.3±0.09           | 0.2±0.01        | 0.03±0.003       | 0.3                               | 0.0004                        |
| <b>APG</b>    | 0.006±0.0009       | 0.005±0.0001    | 0.003±0.0006     | 0.4                               | 0.02                          |
| <b>NAPE</b>   | 0.00007±0.00002    | 0.00007±5.7E-06 | 0.00006±7.80E-06 | 0.9                               | 0.4                           |
| <b>NAPEp</b>  | 0.0009±0.0002      | 0.0008±0.00009  | 0.0002±0.00002   | 0.8                               | 0.003                         |
| <b>NAPS</b>   | 0.01±0.004         | 0.003±0.00009   | 0.002±0.0003     | 0.1                               | 0.02                          |

Table S2. Lipid composition of A431 chloride salt vesicles, A431 DTT/formaldehyde vesicles, and CHO DTT/formaldehyde vesicles, recalculated without cholesterol content by re-scaling the LC-MS data shown in Table S1 and Figure 1.

## Supplementary Figures

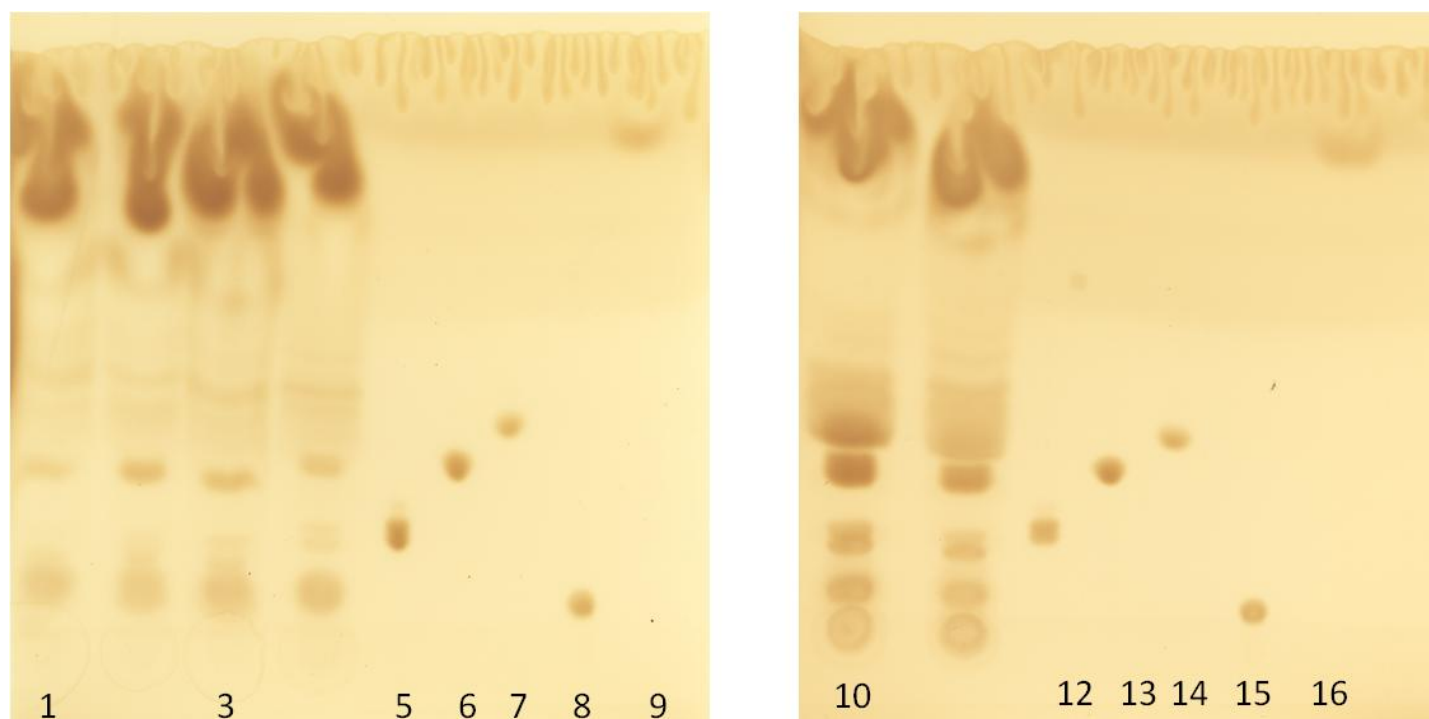

**Figure S1.** Thin-layer chromatogram of lipid extracts from different vesicle preparations. **Lane 1:** CHO, DTT/formaldehyde method. **Lane 3:** A431, DTT/formaldehyde method. **Lane 5:** Sphingomyelin (SM1 and SM2). **Lane 6:** Phosphatidylcholine (PC), **Lane 7:** Phosphatidylethanolamine (PE). **Lane 8:** Phosphatidylserine (PS). **Lane 9:** Cholesterol (CL). **Lane 10:** A431, chloride salt osmotic method. **Lane 12:** Sphingomyelin (SM1 and SM2). **Lane 13:** Phosphatidylcholine (PC), **Lane 14:** Phosphatidylethanolamine (PE). **Lane 15:** Phosphatidylserine (PS). **Lane 16:** Cholesterol (CL). **Thin layer chromatography results for lipid extracts from the three types of vesicles.** Qualitatively, the results support the MS-LC data, as the TLC analysis identifies PC, PE, PS, SM, and Cholesterol.

**A.**

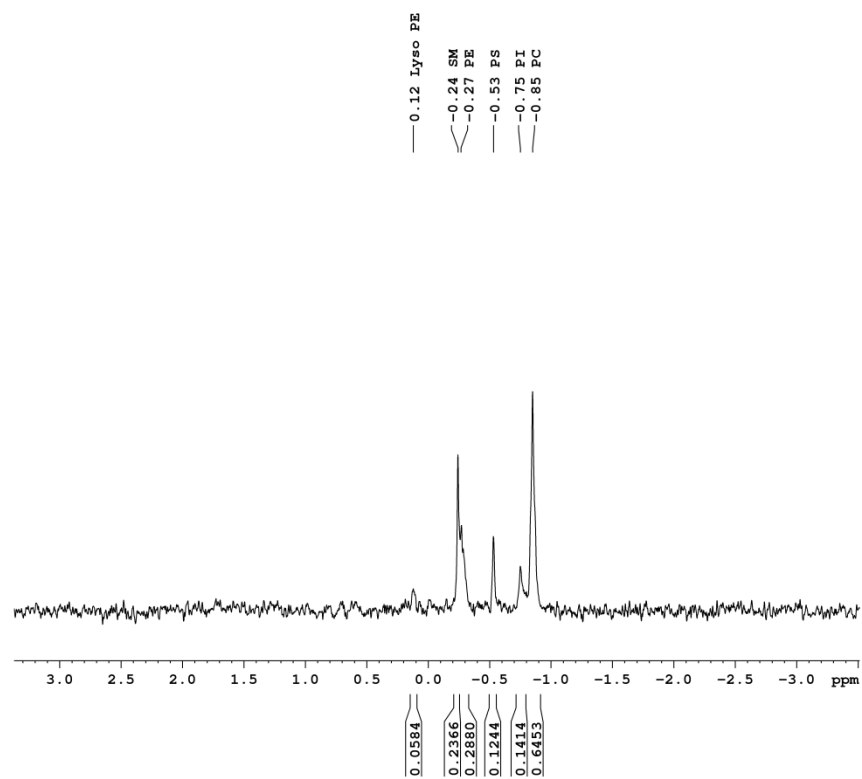

**B.**

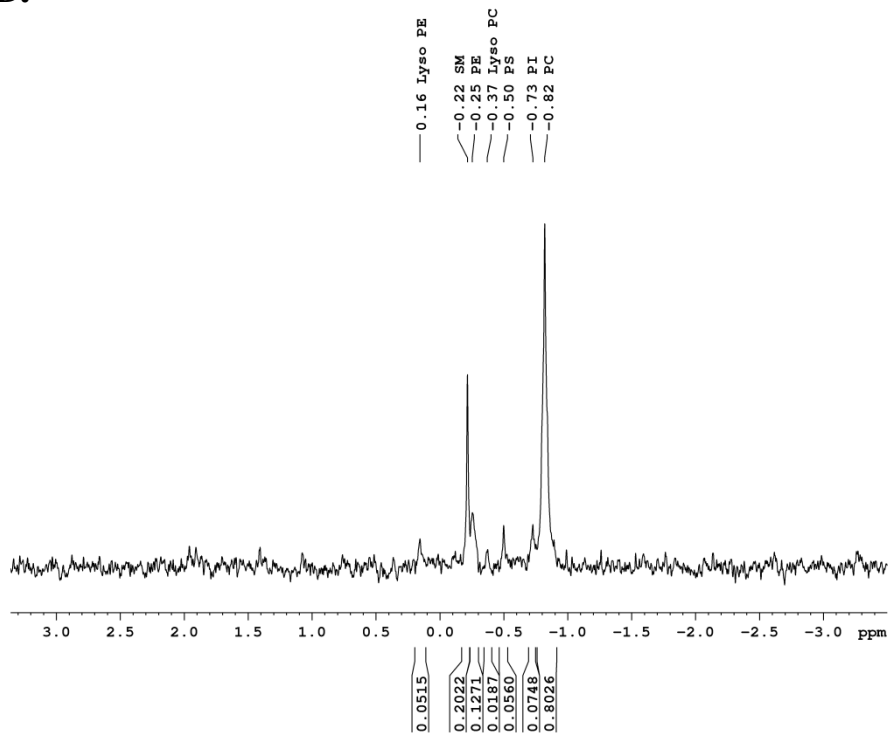

**Figure S2.** <sup>31</sup>P NMR spectra (acquired by Avanti Polar Lipids Analytical Services) for (A) A431 chloride salt vesicles sample and (B) A431 DTT/formaldehyde vesicle sample.

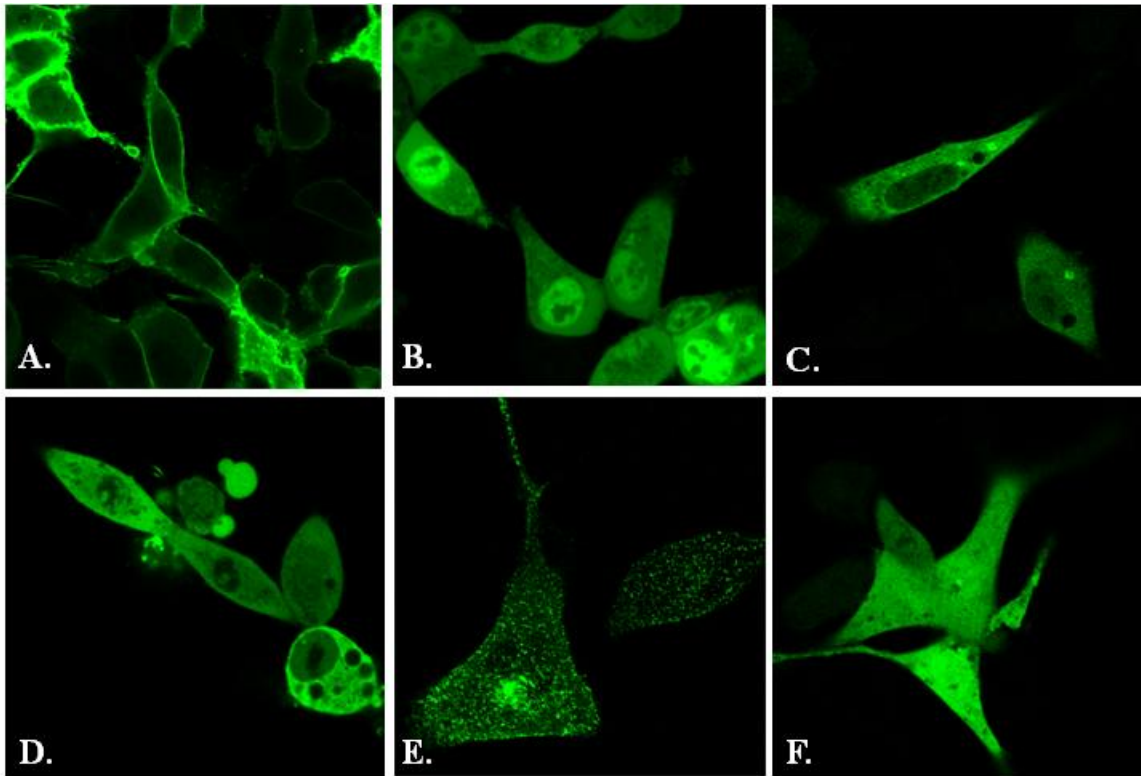

**Figure S3.** CHO cells expressing the soluble cytoplasmic proteins used in the leakage assays: **(A)** Plc $\delta$ 1-PH-GFP (MW~45 kDa), **(B)** Grb2-Venus (MW~60 kDa), **(C)** PKC $\theta$ -GFP (MW~120kDa), **(D)** Venusx6 (MW~160 kDa), **(E)** Intersectin II-GFP (MW~ 170 kDa) and **(F)** Plcy-GFP (MW~210 kDa).

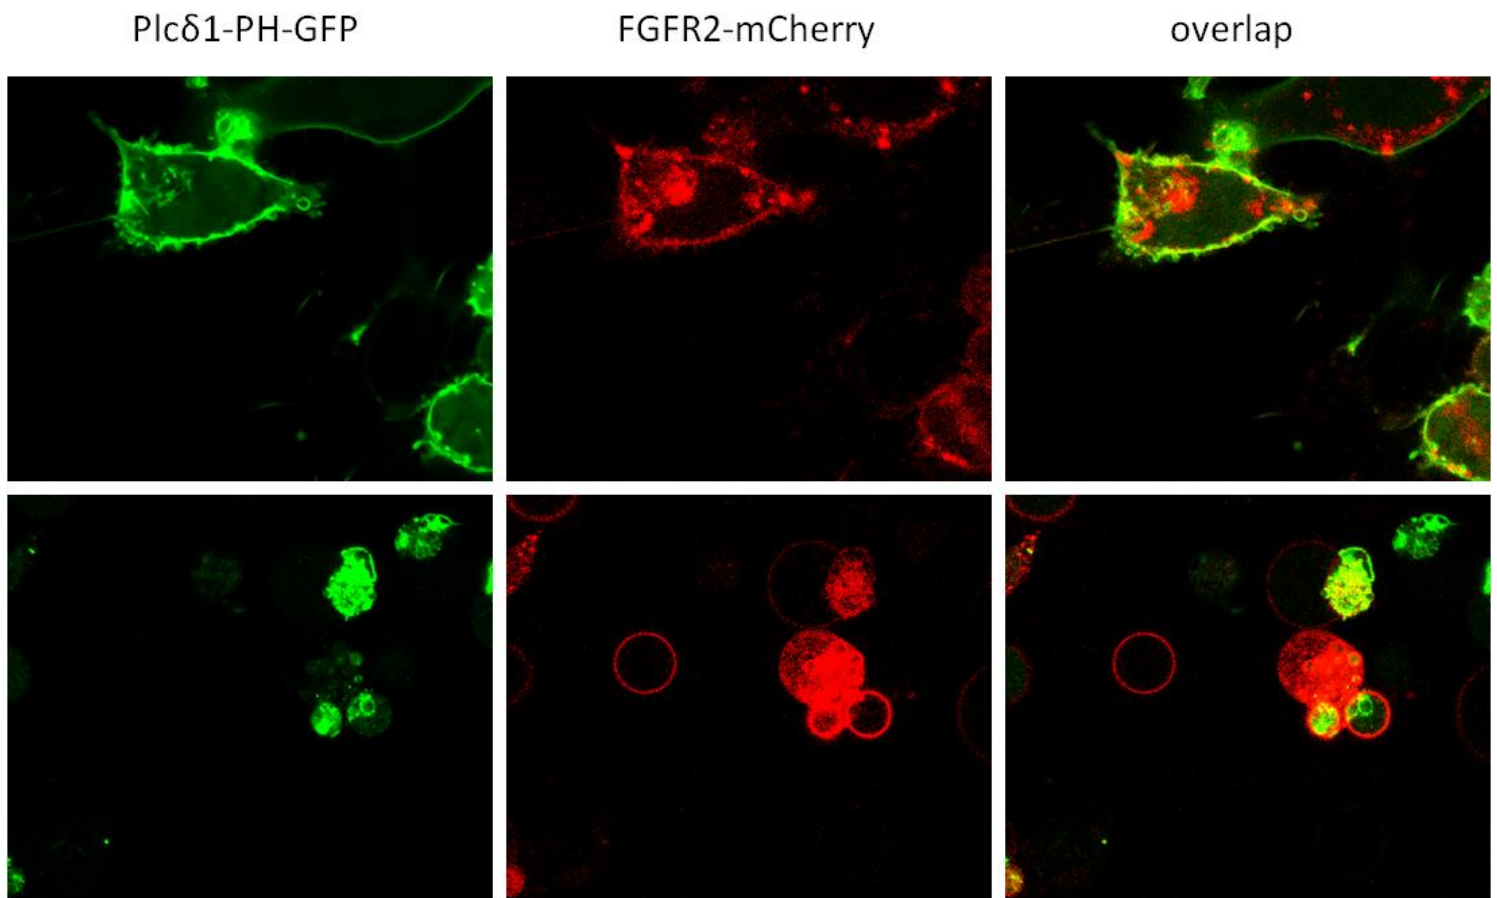

**Figure S4.** Top panel: Chinese Hamster Ovary (CHO) cells co-expressing FGFR2-mCherry and Plcδ1-PH-GFP. Bottom panel: Plcδ1-PH-GFP (MW~45 kDa) is not retained inside CHO chloride salt vesicles.

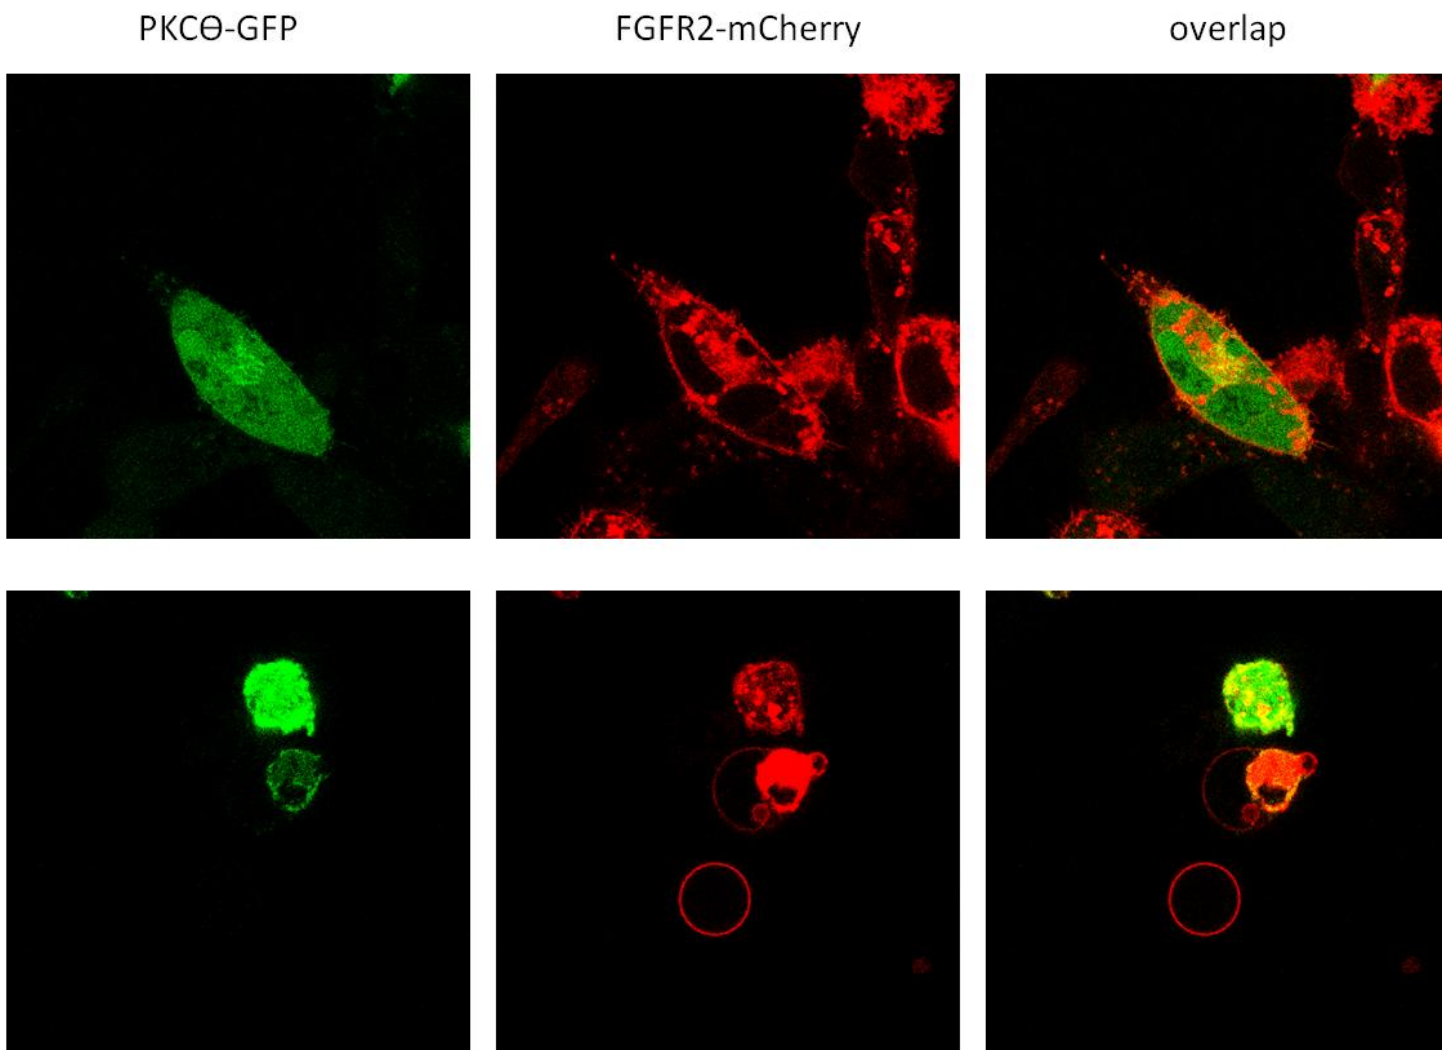

**Figure S5.** Top panel: CHO cells co-expressing PKC $\theta$ -GFP and FGFR2-mCherry. Bottom panel: PKC $\theta$ -GFP (MW~ 120kDa) is not retained inside CHO chloride salt vesicles.

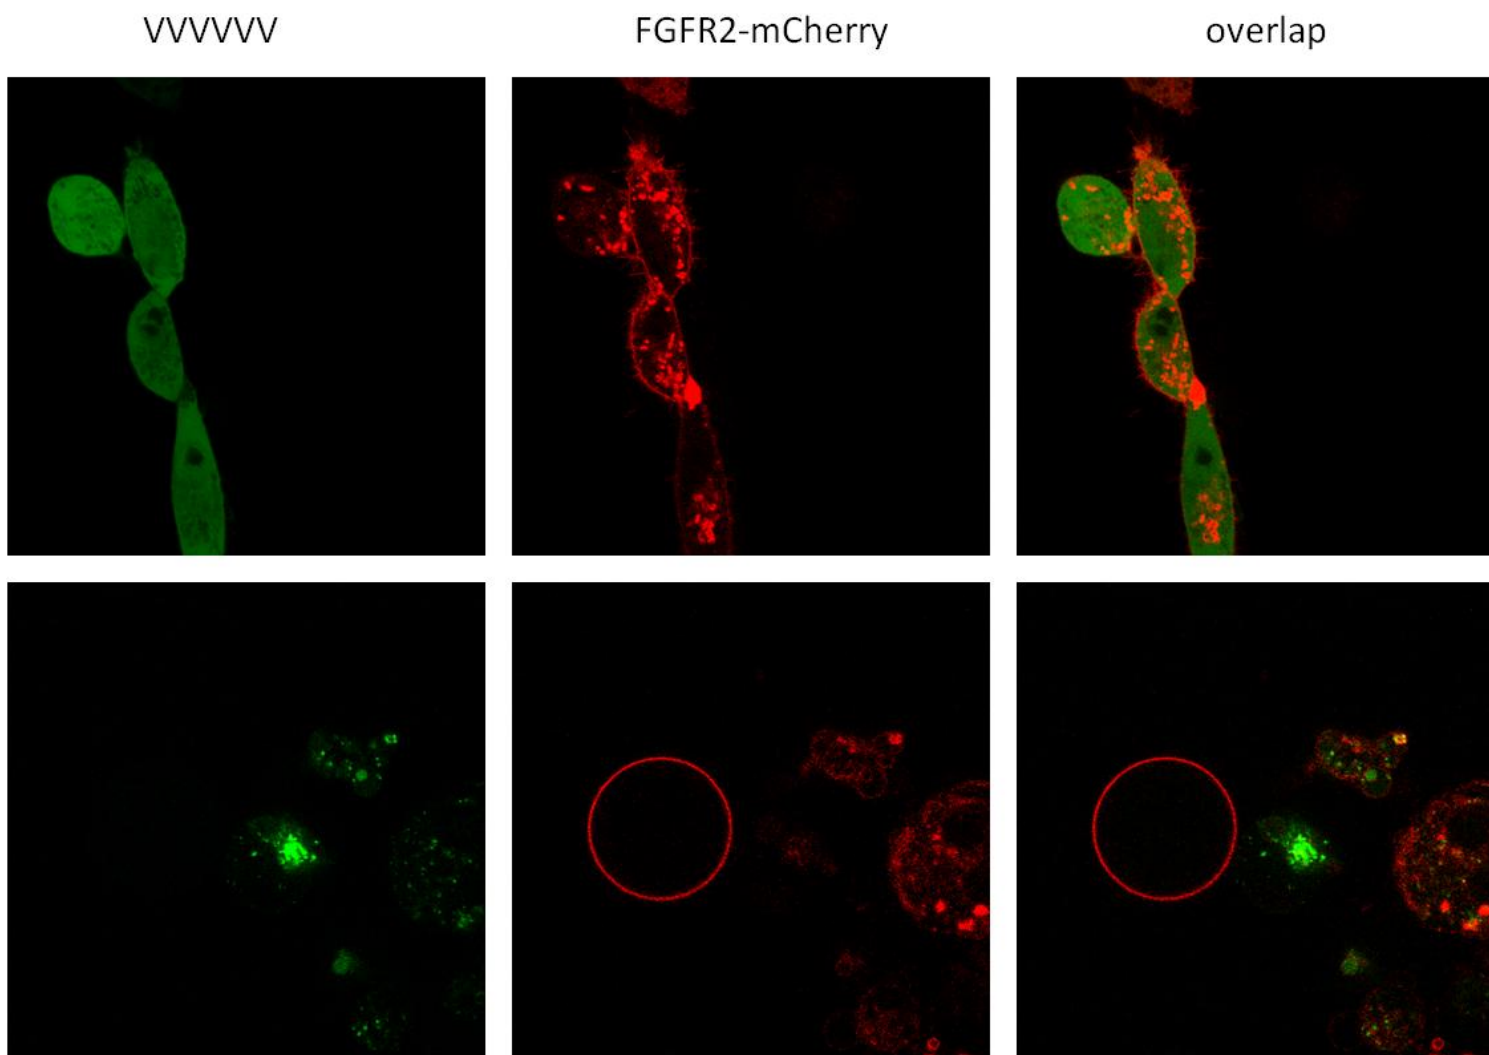

**Figure S6.** Top panel: Chinese Hamster Ovary (CHO) co-expressing VVVVVV (Venus x 6) and FGFR2-mCherry. Bottom panel: Venus x 6 (MW~ 160kDa) is not retained in CHO chloride salt vesicles.



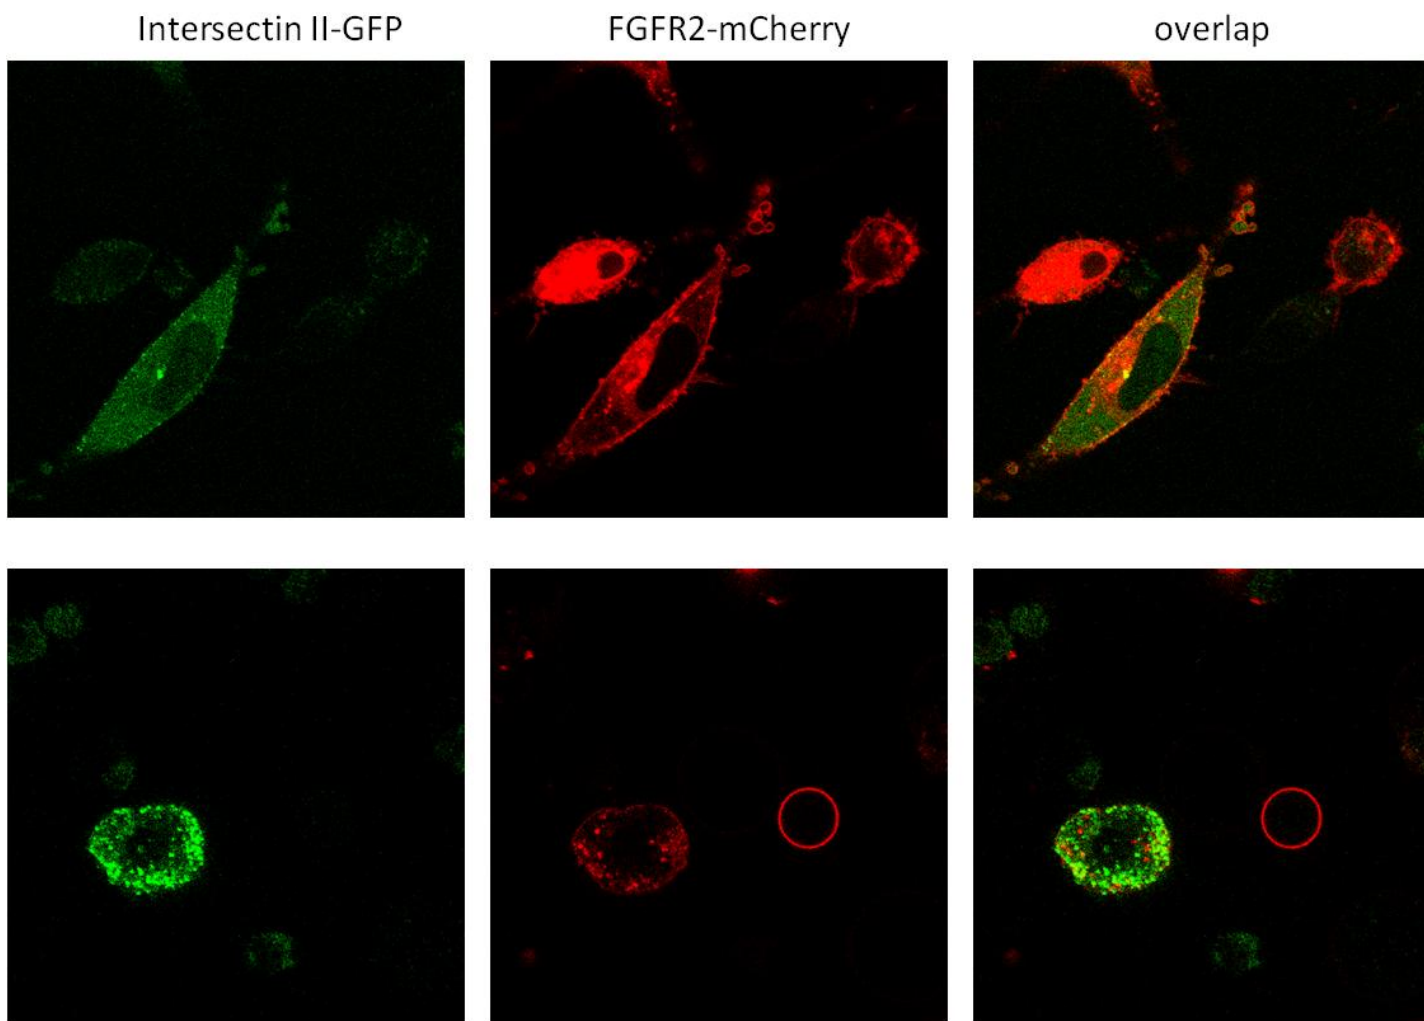

**Figure S7.** Top panel: CHO cells co-expressing Intersectin II-GFP and FGFR2-mCherry. Bottom panel: Intersectin II-GFP (MW~ 170kDa) is not retained inside CHO chloride salt vesicles.
